# Supplementary material for: Adaptation is cost-effective to offset rising river flood risk in Europe
Source: Research Square preprint supplement (doi:10.21203/rs.3.rs-519118/v1), 2021-05-21
Supplement: Supplementary file 1 [file 161a8719c23490479eb937da.pdf]

# **Adaptation strategies to offset rising river flood risk in Europe**

## **Supplementary Information**

### **Summary**

*S1. Additional details on Methods*

*S2. Supplementary results*

*S3. Database of flood protection levels*

*S4. Reliability and uncertainty of the modelling components*

*S5. SI References*

## S1. Additional details on Methods

*Table S1. Regional climate projections used in river flood impact analysis and corresponding year of exceeding 1.5, 2 and 3°C warming. Years are calculated using a 30-year moving average of surface air temperature. For the description of the climate models see Jacob et al. (2014).*

| RCM (R)    | Driving GCM (G)       | RCP4.5 | RCP8.5 | RCP4.5 | RCP8.5 | RCP4.5 | RCP8.5 |
|------------|-----------------------|--------|--------|--------|--------|--------|--------|
|            |                       | 1.5 °C |        | 2 °C   |        | 3 °C   |        |
| CCLM4.8-17 | CNRM-CERFACS-CNRM-CM5 | 2035   | 2029   | 2057   | 2044   |        | 2067   |
|            | ICHEC-EC-EARTH        | 2033   | 2026   | 2056   | 2041   |        | 2066   |
|            | MPI-M-MPI-ESM-LR      | 2034   | 2028   | 2064   | 2044   |        | 2067   |
| HIRHAM5    | ICHEC-EC-EARTH        | 2032   | 2028   | 2054   | 2043   |        | 2065   |
| WRF331F    | IPSL-IPSL-CM5A-MR     | 2023   | 2021   | 2042   | 2035   |        | 2054   |
| RACMO22E   | ICHEC-EC-EARTH        | 2032   | 2026   | 2056   | 2042   |        | 2065   |
| RCA4       | CNRM-CERFACS-CNRM-CM5 | 2035   | 2029   | 2057   | 2044   |        | 2067   |
|            | ICHEC-EC-EARTH        | 2033   | 2026   | 2056   | 2041   |        | 2066   |
|            | IPSL-IPSL-CM5A-MR     | 2023   | 2021   | 2042   | 2035   |        | 2054   |
|            | MOHC-HadGEM2-ES       | 2021   | 2018   | 2037   | 2030   | 2069   | 2051   |
|            | MPI-M-MPI-ESM-LR      | 2034   | 2028   | 2064   | 2044   |        | 2067   |

*Table S2. Adaptation measures considered in the analysis.*

| Adaptation measure            | Description                                                                                                                                                                                                                                                                                                                                                                                                                                                                                                                                                                                                      |
|-------------------------------|------------------------------------------------------------------------------------------------------------------------------------------------------------------------------------------------------------------------------------------------------------------------------------------------------------------------------------------------------------------------------------------------------------------------------------------------------------------------------------------------------------------------------------------------------------------------------------------------------------------|
| Strengthening of dyke systems | Strengthening of dyke systems (DS) consist of elevating river banks through permanent or temporary barriers to increase the maximum streamflow that the watercourse can fully contain and convey downstream without causing damage. Depending on the area, this measure may require building new dykes or increasing the height of existing dykes and barriers. Different typologies of dykes can be used depending on the context (e.g. urban or rural areas), ranging from earthen embankments to vertical floodwalls (Aerts, 2018). In our analysis, we consider only the construction of permanent barriers. |
| Retention areas               | Retention areas (RA) aim at reducing flood hazard by reducing and delaying peak flows during extreme events. This is achieved by creating areas within or aside the river network that can be flooded in a controlled manner when the river stage reaches critical levels (Arrighi et al. 2018). We do not consider here retention reservoirs created by dams as they require larger investments and can have negative environmental implications (Kundzewicz, 1999). Beyond direct flood protection, this measure are used for restoration of floodplain ecosystems.                                            |

|                         |                                                                                                                                                                                                                                                                                                                                                                                                                                                                                                                                                                                                                                                                                                                                                                                                                                                       |
|-------------------------|-------------------------------------------------------------------------------------------------------------------------------------------------------------------------------------------------------------------------------------------------------------------------------------------------------------------------------------------------------------------------------------------------------------------------------------------------------------------------------------------------------------------------------------------------------------------------------------------------------------------------------------------------------------------------------------------------------------------------------------------------------------------------------------------------------------------------------------------------------|
| Flood-proofing measures | <p>Flood-proofing measures (FP) represent structural and non-structural modifications of buildings in order to prevent or minimize flood damage to structures and/or their contents. Dry flood proofing aims at making a building impermeable to floodwaters up to the expected floodwater height. Conversely, wet flood proofing measures allow flooding of the structure and reduce damages by means of flood-adapted use and equipment of buildings. An example of wet flood proofing is the adaption of the interior fitting, which means that in endangered storeys only waterproofed building material and movable small interior decoration and furniture are used. Dry flood proofing measures include adjusting the building structure, e.g. via an elevated configuration or waterproof sealing of the cellar (Gersonius et al., 2008).</p> |
| Relocation              | <p>Relocation (RE) reduces the exposure of people and assets at risk of flooding by moving them to areas with negligible risk (King et al. 2014). In our analysis, we assume that relocation operations include the demolishing of existing buildings, the acquisition of new land and the reconstruction of new buildings. We do not consider relocation for agricultural areas and infrastructures such as roads.</p>                                                                                                                                                                                                                                                                                                                                                                                                                               |

## S2. Supplementary results

*Table S3. Summary of the expected annual damage (EAD) in million € (2015 values) and population exposed (EAPE) in thousand people for all the countries of the study area under present conditions (base), and for the year 2100 under future socioeconomic conditions and climate scenarios (1.5°C, 2°C, 3°C warming).*

| Country           | EAD         |              |              |              | EAPE         |              |              |              |
|-------------------|-------------|--------------|--------------|--------------|--------------|--------------|--------------|--------------|
|                   | base        | 1.5°C        | 2°C          | 3°C          | base         | 1.5°C        | 2°C          | 3°C          |
| Austria           | 257         | 687          | 772          | 1054         | 3.8          | 5.9          | 6.6          | 8.8          |
| Belgium           | 209         | 662          | 945          | 1453         | 3.9          | 9.1          | 12.7         | 19.4         |
| Bulgaria          | 81          | 172          | 219          | 314          | 2.8          | 1.9          | 2.5          | 3.5          |
| Croatia           | 169         | 496          | 700          | 966          | 4.4          | 7.2          | 10.6         | 16.2         |
| Cyprus            | 4           | 7            | 7            | 5            | 0.0          | 0.0          | 0.0          | 0.0          |
| Czechia           | 396         | 1008         | 1267         | 1860         | 6.8          | 10.1         | 12.5         | 18.3         |
| Denmark           | 14          | 37           | 50           | 79           | 0.1          | 0.2          | 0.3          | 0.4          |
| Estonia           | 53          | 106          | 148          | 196          | 0.8          | 0.9          | 1.2          | 1.6          |
| Finland           | 253         | 517          | 810          | 1069         | 3.7          | 3.7          | 5.5          | 7.8          |
| France            | 1246        | 4299         | 6190         | 7309         | 21.9         | 51.9         | 76.8         | 87.7         |
| Germany           | 895         | 2665         | 3784         | 5508         | 27.7         | 43.8         | 61.6         | 92.4         |
| Greece            | 73          | 101          | 140          | 202          | 1.7          | 1.8          | 2.4          | 3.4          |
| Hungary           | 252         | 755          | 1093         | 1937         | 6.5          | 9.7          | 13.7         | 23.3         |
| Ireland           | 58          | 180          | 232          | 477          | 0.9          | 1.6          | 2.1          | 4.0          |
| Italy             | 817         | 2232         | 2667         | 4179         | 18.2         | 31.0         | 36.6         | 56.2         |
| Latvia            | 211         | 438          | 588          | 721          | 4.1          | 2.8          | 3.8          | 4.8          |
| Lithuania         | 104         | 210          | 261          | 352          | 1.3          | 1.0          | 1.2          | 1.7          |
| Luxembourg        | 19          | 56           | 84           | 102          | 0.1          | 0.4          | 0.6          | 0.7          |
| Netherlands       | 77          | 257          | 514          | 670          | 1.6          | 2.9          | 5.8          | 7.6          |
| Poland            | 558         | 1305         | 1665         | 2562         | 18.7         | 20.8         | 26.7         | 41.1         |
| Portugal          | 53          | 78           | 79           | 76           | 0.8          | 1.1          | 1.1          | 1.1          |
| Romania           | 329         | 795          | 1100         | 1639         | 12.5         | 12.6         | 16.1         | 22.4         |
| Slovakia          | 139         | 390          | 484          | 704          | 3.1          | 3.8          | 4.8          | 7.0          |
| Slovenia          | 55          | 140          | 195          | 295          | 1.0          | 1.4          | 1.9          | 2.9          |
| Spain             | 449         | 903          | 938          | 961          | 11.1         | 17.1         | 17.5         | 17.6         |
| Sweden            | 228         | 788          | 1575         | 2979         | 2.0          | 4.7          | 8.5          | 15.4         |
| UK                | 631         | 1944         | 2629         | 4359         | 8.0          | 17.3         | 24.3         | 42.2         |
| <b>EU-27 + UK</b> | <b>7631</b> | <b>21228</b> | <b>29136</b> | <b>42028</b> | <b>167.7</b> | <b>264.7</b> | <b>357.4</b> | <b>507.5</b> |

*Table S4. Differences in flood impacts under the 3°C warming scenario, assuming 2100 socio-economic conditions in respect to present-day conditions. Impacts are given at country level and for EU27+UK as expected annual damage (EAD) and population exposed (EAPE).*

| Country           | Difference in impacts between 2100 and present-day society - 3.0°C scenario |            |
|-------------------|-----------------------------------------------------------------------------|------------|
|                   | EAD                                                                         | EAPE       |
| Austria           | 90%                                                                         | 9%         |
| Belgium           | 94%                                                                         | 41%        |
| Bulgaria          | 61%                                                                         | -46%       |
| Croatia           | 65%                                                                         | 0%         |
| Cyprus            | 77%                                                                         | 207%       |
| Czechia           | 70%                                                                         | -1%        |
| Denmark           | 72%                                                                         | -1%        |
| Estonia           | 59%                                                                         | -11%       |
| Finland           | 77%                                                                         | -1%        |
| France            | 77%                                                                         | 22%        |
| Germany           | 52%                                                                         | -19%       |
| Greece            | 23%                                                                         | -7%        |
| Hungary           | 69%                                                                         | -20%       |
| Ireland           | 95%                                                                         | 15%        |
| Italy             | 68%                                                                         | 6%         |
| Latvia            | 75%                                                                         | -41%       |
| Lithuania         | 52%                                                                         | -37%       |
| Luxembourg        | 91%                                                                         | 142%       |
| Netherlands       | 78%                                                                         | 1%         |
| Poland            | 57%                                                                         | -22%       |
| Portugal          | 38%                                                                         | 35%        |
| Romania           | 59%                                                                         | -24%       |
| Slovakia          | 59%                                                                         | -27%       |
| Slovenia          | 59%                                                                         | -18%       |
| Spain             | 75%                                                                         | 35%        |
| Sweden            | 96%                                                                         | 64%        |
| UK                | 84%                                                                         | 32%        |
| <b>EU-27 + UK</b> | <b>71%</b>                                                                  | <b>-2%</b> |

*Table S5. Overview of two adaptation strategies (retention areas and dikes strengthening) at country level for the 1.5°C warming scenario in 2100. The Benefit-Cost Ratio (BCR) is calculated as ratio of discounted benefits and costs over the period 2020-2100. Reduction (in %) in expected annual damage (EAD) and population exposed (EAPE) are calculated as difference in undiscounted damage and population exposed in 2100 with and without adaptation. Cost of implementation (in €million/year) reflect average of undiscounted costs over the period 2020-2100.*

| Country        | Retention areas |            |            |             | Dikes strengthening |            |            |             |
|----------------|-----------------|------------|------------|-------------|---------------------|------------|------------|-------------|
|                | BCR             | EAD red.   | EAPE red.  | Costs €M/y  | BCR                 | EAD red.   | EAPE red.  | Costs €M/y  |
| Austria        | 2.5             | 72%        | 72%        | 75.0        | 1.9                 | 49%        | 47%        | 63.8        |
| Belgium        | 3.6             | 81%        | 80%        | 55.8        | 2.5                 | 76%        | 75%        | 72.0        |
| Bulgaria       | 2.2             | 64%        | 65%        | 15.2        | 1.9                 | 14%        | 17%        | 3.3         |
| Croatia        | 2.5             | 90%        | 89%        | 60.4        | 1.5                 | 49%        | 47%        | 49.8        |
| Cyprus         | 0.0             | 0%         | 0%         | 0.0         | 0.0                 | 0%         | 0%         | 0.0         |
| Czechia        | 3.6             | 81%        | 81%        | 71.7        | 2.1                 | 53%        | 53%        | 79.1        |
| Denmark        | 2.9             | 81%        | 81%        | 4.3         | 1.2                 | 31%        | 33%        | 3.1         |
| Estonia        | 0.9             | 31%        | 31%        | 5.3         | 1.1                 | 41%        | 44%        | 6.8         |
| Finland        | 2.3             | 51%        | 42%        | 41.9        | 2.0                 | 26%        | 19%        | 22.6        |
| France         | 2.8             | 77%        | 79%        | 447.7       | 2.0                 | 52%        | 58%        | 400.8       |
| Germany        | 3.3             | 66%        | 64%        | 220.8       | 2.3                 | 53%        | 52%        | 245.6       |
| Greece         | 2.2             | 56%        | 58%        | 9.3         | 0.6                 | 6%         | 8%         | 1.2         |
| Hungary        | 2.3             | 73%        | 73%        | 70.7        | 2.0                 | 28%        | 26%        | 26.6        |
| Ireland        | 2.2             | 63%        | 62%        | 19.2        | 1.6                 | 33%        | 31%        | 12.4        |
| Italy          | 4.2             | 80%        | 83%        | 181.3       | 2.3                 | 57%        | 61%        | 233.9       |
| Latvia         | 3.5             | 44%        | 50%        | 22.3        | 1.7                 | 49%        | 54%        | 33.7        |
| Lithuania      | 2.7             | 25%        | 25%        | 8.7         | 0.8                 | 10%        | 10%        | 3.7         |
| Luxembourg     | 3.5             | 83%        | 84%        | 5.7         | 2.6                 | 81%        | 80%        | 7.0         |
| Netherlands    | 3.8             | 34%        | 31%        | 7.6         | 2.6                 | 42%        | 38%        | 12.1        |
| Poland         | 1.9             | 48%        | 48%        | 109.0       | 1.5                 | 11%        | 11%        | 28.5        |
| Portugal       | 2.7             | 9%         | 8%         | 0.9         | 1.7                 | 6%         | 3%         | 0.7         |
| Romania        | 2.1             | 41%        | 43%        | 44.8        | 1.8                 | 17%        | 11%        | 19.4        |
| Slovakia       | 2.9             | 76%        | 75%        | 34.2        | 2.8                 | 39%        | 37%        | 19.5        |
| Slovenia       | 2.0             | 74%        | 72%        | 16.5        | 1.5                 | 33%        | 34%        | 9.2         |
| Spain          | 1.9             | 24%        | 23%        | 43.2        | 1.8                 | 8%         | 5%         | 14.9        |
| Sweden         | 2.7             | 54%        | 51%        | 53.8        | 3.6                 | 39%        | 34%        | 37.3        |
| United Kingdom | 5.4             | 86%        | 84%        | 122.4       | 2.6                 | 74%        | 71%        | 216.3       |
| <b>EU+UK</b>   | <b>3.2</b>      | <b>68%</b> | <b>67%</b> | <b>1772</b> | <b>2.3</b>          | <b>46%</b> | <b>45%</b> | <b>1645</b> |

*Table S6. Overview of two adaptation strategies (flood proofing of buildings and relocation) at country level for the 1.5°C warming scenario in 2100. Benefit-Cost Ratio (BCR) is calculated as ratio of discounted benefits and costs over the period 2020-2100. Reduction (in %) in expected annual damage (EAD) and population exposed (EAPE) are calculated as difference in undiscounted damage and population exposed in 2100 with and without adaptation. Cost of implementation (in €million/year) reflect average of undiscounted costs over the period 2020-2100.*

| Country        | Flood proofing |             |            | Relocation |             |             |            |
|----------------|----------------|-------------|------------|------------|-------------|-------------|------------|
|                | BCR            | EAD red.    | Costs €M/y | BCR        | EAD red.    | EAPE red.   | Costs €M/y |
| Austria        | 6.2            | 0.0%        | 0.0        | 0.0        | 0.0%        | 0.0%        | 0.0        |
| Belgium        | 29.0           | 0.0%        | 0.0        | 0.0        | 0.0%        | 0.0%        | 0.0        |
| Bulgaria       | 2.0            | 0.2%        | 0.1        | 0.5        | 0.0%        | 0.0%        | 0.0        |
| Croatia        | 2.1            | 0.3%        | 0.3        | 0.0        | 0.0%        | 0.0%        | 0.0        |
| Cyprus         | 0.0            | 0.0%        | 0.0        | 0.0        | 0.0%        | 0.0%        | 0.0        |
| Czechia        | 2.6            | 0.2%        | 0.5        | 3.4        | 0.0%        | 0.0%        | 0.0        |
| Denmark        | 0.2            | 0.1%        | 0.0        | 0.0        | 0.0%        | 0.1%        | 0.0        |
| Estonia        | 114.7          | 0.7%        | 0.2        | 186.9      | 0.1%        | 0.1%        | 0.0        |
| Finland        | 2.9            | 0.3%        | 0.4        | 23.0       | 0.0%        | 0.1%        | 0.0        |
| France         | 2.9            | 0.1%        | 1.6        | 4.1        | 0.0%        | 0.0%        | 0.1        |
| Germany        | 4.2            | 0.1%        | 0.3        | 5.9        | 0.0%        | 0.0%        | 0.1        |
| Greece         | 3.0            | 0.4%        | 0.1        | 2.8        | 0.1%        | 0.0%        | 0.0        |
| Hungary        | 40.1           | 0.0%        | 0.0        | 1.4        | 0.0%        | 0.0%        | 0.0        |
| Ireland        | 1.6            | 0.3%        | 0.2        | 40.5       | 0.0%        | 0.1%        | 0.0        |
| Italy          | 2.0            | 0.4%        | 2.1        | 70.2       | 0.0%        | 0.0%        | 0.0        |
| Latvia         | 2.6            | 0.4%        | 0.4        | 8.0        | 0.0%        | 0.0%        | 0.0        |
| Lithuania      | 8.3            | 0.2%        | 0.1        | 79.0       | 0.1%        | 0.1%        | 0.0        |
| Luxembourg     | 0.3            | 0.2%        | 0.1        | 0.0        | 0.0%        | 0.0%        | 0.0        |
| Netherlands    | 0.0            | 0.0%        | 0.0        | 0.0        | 0.0%        | 0.0%        | 0.0        |
| Poland         | 5.6            | 0.1%        | 0.1        | 4.8        | 0.0%        | 0.1%        | 0.0        |
| Portugal       | 5.2            | 0.3%        | 0.0        | 5.8        | 0.2%        | 0.2%        | 0.0        |
| Romania        | 2.7            | 0.6%        | 0.7        | 2.0        | 0.1%        | 0.0%        | 0.1        |
| Slovakia       | 2.6            | 0.0%        | 0.0        | 0.0        | 0.0%        | 0.0%        | 0.0        |
| Slovenia       | 3.8            | 0.2%        | 0.0        | 0.0        | 0.1%        | 0.1%        | 0.0        |
| Spain          | 3.1            | 0.9%        | 1.2        | 3.3        | 0.4%        | 0.2%        | 0.4        |
| Sweden         | 3.1            | 5.4%        | 9.3        | 5.0        | 0.1%        | 0.1%        | 0.1        |
| United Kingdom | 3.4            | 7.2%        | 25.7       | 1.9        | 0.2%        | 0.1%        | 0.5        |
| <b>EU+UK</b>   | <b>2.3</b>     | <b>1.1%</b> | <b>43</b>  | <b>2.9</b> | <b>0.1%</b> | <b>0.0%</b> | <b>1.3</b> |

*Table S7. Overview of two adaptation strategies (retention areas and dikes strengthening) at country level for the 2°C warming scenario in 2100. Benefit-Cost Ratio (BCR) is calculated as ratio of discounted benefits and costs over the period 2020-2100. Reduction (in %) in expected annual damage (EAD) and population exposed (EAPE) are calculated as difference in undiscounted damage and population exposed in 2100 with and without adaptation. Cost of implementation (in €million/year) reflect average of undiscounted costs over the period 2020-2100.*

| Country        | Retention areas |            |            |             | Dikes strengthening |            |            |             |
|----------------|-----------------|------------|------------|-------------|---------------------|------------|------------|-------------|
|                | BCR             | EAD red.   | EAPE red.  | Costs €M/y  | BCR                 | EAD red.   | EAPE red.  | Costs €M/y  |
| Austria        | 2.5             | 72%        | 75%        | 75.0        | 1.9                 | 49%        | 53%        | 63.8        |
| Belgium        | 3.6             | 81%        | 85%        | 55.8        | 2.5                 | 76%        | 77%        | 72.0        |
| Bulgaria       | 2.2             | 64%        | 73%        | 15.2        | 1.9                 | 14%        | 29%        | 3.3         |
| Croatia        | 2.5             | 90%        | 92%        | 60.4        | 1.5                 | 49%        | 64%        | 49.8        |
| Cyprus         | 0.0             | 0%         | 0%         | 2.0         | 0.0                 | 0%         | 0%         | 0.0         |
| Czechia        | 3.6             | 81%        | 84%        | 71.7        | 2.1                 | 53%        | 58%        | 79.1        |
| Denmark        | 2.9             | 81%        | 86%        | 4.3         | 1.2                 | 31%        | 46%        | 3.1         |
| Estonia        | 0.9             | 31%        | 55%        | 5.3         | 1.1                 | 41%        | 62%        | 6.8         |
| Finland        | 2.3             | 51%        | 59%        | 41.9        | 2.0                 | 26%        | 44%        | 22.6        |
| France         | 2.8             | 77%        | 86%        | 447.7       | 2.0                 | 52%        | 71%        | 400.8       |
| Germany        | 3.3             | 66%        | 73%        | 220.8       | 2.3                 | 53%        | 63%        | 245.6       |
| Greece         | 2.2             | 56%        | 67%        | 9.3         | 0.6                 | 6%         | 28%        | 1.2         |
| Hungary        | 2.3             | 73%        | 81%        | 70.7        | 2.0                 | 28%        | 43%        | 26.6        |
| Ireland        | 2.2             | 63%        | 71%        | 19.2        | 1.6                 | 33%        | 40%        | 12.4        |
| Italy          | 4.2             | 80%        | 85%        | 181.3       | 2.3                 | 57%        | 68%        | 233.9       |
| Latvia         | 3.5             | 44%        | 63%        | 22.3        | 1.7                 | 49%        | 66%        | 33.7        |
| Lithuania      | 2.7             | 25%        | 26%        | 8.7         | 0.8                 | 10%        | 23%        | 3.7         |
| Luxembourg     | 3.5             | 83%        | 89%        | 5.7         | 2.6                 | 81%        | 87%        | 7.0         |
| Netherlands    | 3.8             | 34%        | 50%        | 7.6         | 2.6                 | 42%        | 62%        | 12.1        |
| Poland         | 1.9             | 48%        | 58%        | 109.0       | 1.5                 | 11%        | 21%        | 28.5        |
| Portugal       | 2.7             | 9%         | 8%         | 0.9         | 1.7                 | 6%         | 3%         | 0.7         |
| Romania        | 2.1             | 41%        | 52%        | 44.8        | 1.8                 | 17%        | 21%        | 19.4        |
| Slovakia       | 2.9             | 76%        | 80%        | 34.2        | 2.8                 | 39%        | 44%        | 19.5        |
| Slovenia       | 2.0             | 74%        | 77%        | 16.5        | 1.5                 | 33%        | 47%        | 9.2         |
| Spain          | 1.9             | 24%        | 28%        | 43.2        | 1.8                 | 8%         | 7%         | 14.9        |
| Sweden         | 2.7             | 54%        | 73%        | 53.8        | 3.6                 | 39%        | 60%        | 37.3        |
| United Kingdom | 5.4             | 86%        | 88%        | 122.4       | 2.6                 | 74%        | 79%        | 216.3       |
| <b>EU+UK</b>   | <b>3.8</b>      | <b>75%</b> | <b>74%</b> | <b>2155</b> | <b>2.8</b>          | <b>58%</b> | <b>56%</b> | <b>2258</b> |



*Table S8. Overview of two adaptation strategies (flood proofing of buildings and relocation) at country level for the 2°C warming scenario in 2100. Benefit-Cost Ratio (BCR) is calculated as ratio of discounted benefits and costs over the period 2020-2100. Reduction (in %) in expected annual damage (EAD) and population exposed (EAPE) are calculated as difference in undiscounted damage and population exposed in 2100 with and without adaptation. Cost of implementation (in €million/year) reflect average of undiscounted costs over the period 2020-2100.*

| Country        | Flood proofing |             |            | Relocation |             |             |            |
|----------------|----------------|-------------|------------|------------|-------------|-------------|------------|
|                | BCR            | EAD red.    | Costs €M/y | BCR        | EAD red.    | EAPE red.   | Costs €M/y |
| Austria        | 4.5            | 0.1%        | 0.3        | 0.1        | 0.0%        | 0.0%        | 0.0        |
| Belgium        | 16.2           | 0.2%        | 0.6        | 1.3        | 0.0%        | 0.0%        | 0.0        |
| Bulgaria       | 1.7            | 1.0%        | 0.5        | 0.9        | 0.1%        | 0.0%        | 0.0        |
| Croatia        | 2.1            | 0.3%        | 0.5        | 0.1        | 0.0%        | 0.0%        | 0.0        |
| Cyprus         | 0.0            | 0.0%        | 0.0        | 0.0        | 0.0%        | 0.0%        | 0.0        |
| Czechia        | 2.2            | 2.1%        | 6.1        | 3.4        | 0.1%        | 0.0%        | 0.1        |
| Denmark        | 0.5            | 0.3%        | 0.1        | 0.0        | 0.0%        | 0.1%        | 0.0        |
| Estonia        | 11.4           | 13%         | 2.0        | 333.2      | 0.1%        | 0.1%        | 0.0        |
| Finland        | 7.9            | 5.9%        | 8.6        | 21.7       | 0.2%        | 0.2%        | 0.2        |
| France         | 2.3            | 0.6%        | 9.2        | 4.3        | 0.0%        | 0.0%        | 0.1        |
| Germany        | 3.0            | 0.3%        | 3.1        | 6.2        | 0.0%        | 0.0%        | 0.1        |
| Greece         | 3.8            | 0.9%        | 0.3        | 2.6        | 0.2%        | 0.0%        | 0.0        |
| Hungary        | 29.5           | 0.3%        | 1.0        | 5.0        | 0.0%        | 0.0%        | 0.0        |
| Ireland        | 1.7            | 0.5%        | 0.4        | 42.4       | 0.0%        | 0.1%        | 0.0        |
| Italy          | 1.9            | 0.9%        | 6.1        | 52.0       | 0.0%        | 0.0%        | 0.1        |
| Latvia         | 2.9            | 23%         | 27.7       | 6.4        | 0.1%        | 0.0%        | 0.0        |
| Lithuania      | 6.8            | 0.7%        | 0.5        | 71.8       | 0.1%        | 0.1%        | 0.0        |
| Luxembourg     | 0.8            | 0.6%        | 0.2        | 0.0        | 0.0%        | 0.0%        | 0.0        |
| Netherlands    | 0.0            | 0.0%        | 0.0        | 0.0        | 0.0%        | 0.0%        | 0.0        |
| Poland         | 4.2            | 0.2%        | 0.6        | 5.4        | 0.0%        | 0.1%        | 0.0        |
| Portugal       | 6.2            | 0.3%        | 0.0        | 5.8        | 0.2%        | 0.3%        | 0.0        |
| Romania        | 2.9            | 1.1%        | 1.6        | 2.0        | 0.5%        | 0.1%        | 0.7        |
| Slovakia       | 3.1            | 0.0%        | 0.0        | 0.3        | 0.0%        | 0.0%        | 0.0        |
| Slovenia       | 3.6            | 0.3%        | 0.1        | 0.5        | 0.1%        | 0.1%        | 0.0        |
| Spain          | 3.0            | 2.8%        | 4.7        | 3.4        | 0.5%        | 0.4%        | 0.5        |
| Sweden         | 2.9            | 45%         | 80.1       | 4.1        | 11%         | 9.3%        | 23.7       |
| United Kingdom | 2.9            | 15%         | 92.4       | 2.1        | 0.2%        | 0.1%        | 0.6        |
| <b>EU+UK</b>   | <b>2.6</b>     | <b>5.0%</b> | <b>247</b> | <b>2.1</b> | <b>0.7%</b> | <b>0.3%</b> | <b>27</b>  |

### **S3. Database of flood protection levels**

Reliable information on flood protection levels is crucial for a correct estimation of river flood risk. In Europe, detailed descriptions of protection structures (i.e. type, location, geometry, design parameters) are usually available only for limited areas, while information on the design level of protection can be found for a few countries and urban areas (Scussolini et al., 2016, Dottori et al., 2017). Recent studies tried to overcome these limitations by developing empirical functions for estimating protection levels where information is not available. Jongman et al. (2014), estimated protection levels in Europe according to modelled flood risk, assigning higher protection in areas with higher risk. Scussolini et al. (2016) combined reported protection levels (based on technical reports and policy recommendations) with modelled values, interpolated at local administrative level according to gross domestic product. In several countries in Europe, these two datasets propose substantially different protection levels, especially in Northern and Eastern Europe.

The reliability of estimating protection levels through proxy variables has been questioned. In a recent study carried out in United States, Wing et al., (2019) did not find any clear link between protection standards and variables such as degree of urbanization, gross domestic product, population density and land use. On the other hand, according to Jongman et al (2014) major European river watersheds such as the Rhine and the Danube maintain higher levels of protection in densely populated areas than in rural areas.

For the present study, we developed a new dataset of flood defence standards. The dataset is built combining different sources of information on protection levels, using modelled and observed flood losses to select the most plausible protection levels for each country in geographical Europe (excluding Russia, Belarus, Ukraine, and countries in the Caucasus).

The following set of rules dictate the hierarchical flood protection standards used in the dataset:

- Highest priority is given to information about design protection levels, where available from either official reports or scientific publications. To this end, we used the information collected by Scussolini et al (2016), integrated with additional reported data from literature review.
- Elsewhere, the level of flood defence is determined at country scale. We used the flood risk modelling framework described in this work to calculate multiple flood loss scenarios, using the two datasets of protection standards currently available for all Europe (Jongman

et al., 2014; Scussolini et al. 2016) and a range of uniform protection values at country scale.

- In countries where national-scale flood loss assessments are available (either from technical reports, scientific publications, or loss datasets such as EM-DAT (2019), the NatCatService (Munich-RE, 2018) and HANZE (Paprotny et al., 2018) ), we selected from the multiple flood loss scenarios the protection values that provide the closest match with national-scale flood losses;
- In countries where all modelled flood loss scenarios exceed 200% of reference loss data, we used a uniform national value between 50 and 150 years. We did not use higher protection levels to avoid unrealistic values in countries where modelled losses are far from reports (e.g. Scandinavian countries), or where few reported data are available, due to the limitations of both the modelling framework and reported data (see Section S4 for a discussion).

Note that the selection of protection levels is carried out at the country scale because flood losses from observations are mostly reported at national level. The map in Figure S1 shows the distribution of protection levels across Europe, while Table S9 compares reported and modelled losses.

#### **S4. Reliability and uncertainty of the modelling components**

Modelling present and future river flood impacts at continental scale requires inevitable simplifications, which limit the accuracy of results. Furthermore, there is substantial uncertainty pertaining to models and datasets representing hazard, exposure and vulnerability, especially when used for projecting future scenarios (Dottori et al., 2018). Alfieri et al. (2016) applied a modelling framework comparable to the present work to model the impacts of major flood events that occurred in Europe since 1990, and found that recorded impacts could be adequately reproduced. However, they did not investigate in detail the skill of the single modelling components. In this Section we discuss the main sources of uncertainty of the modelling framework, we review previous validation exercises of the modelling components, and we present additional validation results regarding economic losses

The river flood hazard maps have been evaluated by Dottori et al. (2021) using official hazard maps for Hungary, Italy, Norway, Spain and the United Kingdom. Modelled maps could identify

on average two-thirds of reference flood extent, however they also overestimated flood-prone areas for flood probabilities below 1-in-100-year, while for return periods equal or above 500 years the maps could correctly identify more than half of flooded areas.

*Figure S1. Distribution of flood protection levels across Europe, expressed as maximum return period of the design flood (in years). Countries not included in the analysis are depicted in dark grey.*

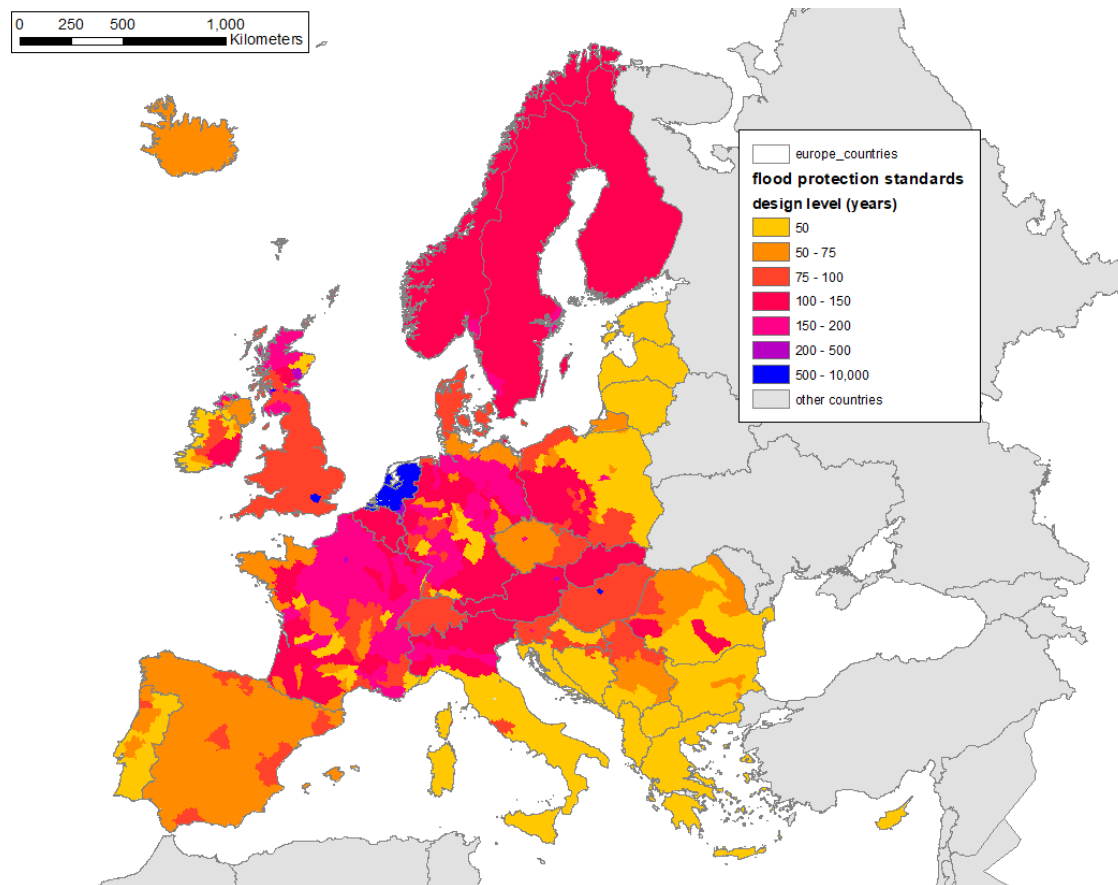

*Table S9. Comparison of modelled flood losses against reported data from national reports and loss datasets (HANZE (Paprotny et al., 2018); EM-DAT (2019), the NatCatService (Munich-RE, 2018).*

| Country | Loss datasets (1990-2015 )<br>(million € 2015) |                   |        | National<br>loss<br>reports<br>(million €<br>2015) | Modelled<br>losses -<br>(million €<br>2015) | Notes -references for national<br>reports |
|---------|------------------------------------------------|-------------------|--------|----------------------------------------------------|---------------------------------------------|-------------------------------------------|
|         | HANZE<br>- river                               | NatCat<br>Service | EM-DAT |                                                    |                                             |                                           |
| Albania |                                                | 5.3               | 1.2    |                                                    | 31.1                                        |                                           |

|                    |            |        |        |         |        |                                                                                      |
|--------------------|------------|--------|--------|---------|--------|--------------------------------------------------------------------------------------|
| Austria            | 220.4      | 232.0  | 193.1  |         | 311.2  |                                                                                      |
| Belgium            | 11.7       | 13.0   | 8.2    |         | 256.7  |                                                                                      |
| Bosnia_Herzegovina |            | 48.9   | 14.5   |         | 147.4  |                                                                                      |
| Bulgaria           | 21.3       | 51.0   | 31.2   |         | 97.7   |                                                                                      |
| Croatia            | 19.4       | 57.3   | 2.4    |         | 260.1  |                                                                                      |
| Cyprus             |            | 0.2    | 0.0    |         | 4.1    |                                                                                      |
| Czech_Republic     | 324.0      | 332.8  | 321.8  | 433-546 | 501.8  | Puncochar 2012; Soukorova and Furova 2012                                            |
| Denmark            | <b>0.0</b> | 2.5    | 0.0    |         | 16.5   |                                                                                      |
| Estonia            | <b>0.0</b> | 0.0    | 0.0    |         | 54.6   |                                                                                      |
| Finland            | 0.6        | 0.9    | 0.0    | 2.5     | 193.5  | Silander et al 2012                                                                  |
| France             | 262.1      | 270.3  | 265.3  | 664-800 | 1645.5 | Mouncolon et al. 2014; FFA 2015; Richert et al., 2019 (all types of floods included) |
| North Macedonia    | <b>0.0</b> | 12.3   | 11.1   |         | 31.3   |                                                                                      |
| Germany            | 859.9      | 1011.1 | 1001.4 |         | 1202.4 |                                                                                      |
| Greece             | 1.8        | 29.5   | 59.0   |         | 76.9   |                                                                                      |
| Hungary            | 59.7       | 47.1   | 39.5   |         | 333.6  |                                                                                      |
| Iceland            |            | 0.1    | 0.0    |         | 11.6   |                                                                                      |
| Ireland            | 12.4       | 49.0   | 11.6   | 97      | 73.3   | OPV 2003                                                                             |
| Italy              | 484.7      | 1250.7 | 1075.8 |         | 1168.2 |                                                                                      |
| Latvia             | <b>0.0</b> | 0.0    | 0.0    |         | 218.3  |                                                                                      |
| Lithuania          | 0.1        | 0.0    | 0.0    |         | 121.8  |                                                                                      |
| Luxembourg         | 1.0        | 0.9    | 0.5    |         | 20.6   |                                                                                      |
| Montenegro         |            | 0.5    | 0.0    |         | 17.7   |                                                                                      |
| Netherlands        | 11.9       | 76.9   | 28.9   |         | 92.0   |                                                                                      |
| Norway             | 26.6       | 14.3   | 11.2   | 34      | 120.5  | Berg 2002                                                                            |
| Poland             | 325.2      | 342.4  | 340.9  | 359     | 697.0  | WB 2015                                                                              |
| Portugal           | 0.6        | 0.2    | 0.8    |         | 55.5   |                                                                                      |
| Romania            | 123.4      | 156.7  | 132.4  | 894     | 415.5  | MMAP                                                                                 |
| Serbia             |            | 69.5   | 101.0  |         | 284.1  |                                                                                      |
| Slovakia           | 17.5       | 34.6   | 16.9   | 81      | 190.6  | Zeleňáková and Vranayová                                                             |
| Slovenia           | 59.1       | 13.3   | 8.0    | 86      | 76.2   | Komelj 2015                                                                          |
| Spain              | 28.7       | 70.0   | 60.2   | 1059    | 495.3  | CCS 2004 (all type of floods)                                                        |
| Sweden             | 3.4        | 1.8    | 0.0    |         | 214.7  |                                                                                      |
| Switzerland        |            | 207.1  | 132.8  | 265     | 316.5  | WSL 2018 (floods and debris flows)                                                   |
| United_Kingdom     | 375.6      | 622.5  | 870.3  | 2028    | 863.6  | OST 2004 (coastal and river floods)                                                  |

The use of an ensemble with 22 climate projections aims at characterizing the overall climate uncertainty in the hydrological simulations (Mentaschi et al., 2020). However, the ensemble

might still underrepresent the real uncertainty of future climate scenarios (McSweeney and Jones, 2015). Other factors such as the bias correction of climate projections and the spatial resolution of the input data may influence results though probably to a smaller degree (Alfieri et al., 2018). In this work we used a single hydrological model for all future projections, namely the Lisflood model. The skill of LISFLOOD in reproducing observed climate has been extensively validated by Arnal et al. (2019). Using an ensemble of hydrological models might better represent the uncertainty of future hydrological changes, since previous research (Dankers et al., 2014; Dottori et al., 2018) showed that future streamflow and inundation projections are significantly affected by the choice of hydrological and flooding components.

The accuracy of exposure data have been tested in previous studies (Batista e Silva et al., 2018; Rosina et al., 2018), however the 100m resolution used might be insufficient to characterize population and asset exposure in some areas (Smith et al., 2019)

Methods for evaluating economic losses due to floods are a key source of uncertainty in evaluating flood impacts (De Moel and Aerts, 2011). Huizinga et al. (2017) observed that the potential uncertainty of flood damage functions can exceed  $\pm 50\%$ , although this value is in line with the typical accuracy of damage models (De Moel and Aerts, 2011). This is further exemplified by previous applications of damage functions that showed mixed performances when compared with observed damages (Jongman et al., 2012; Amadio et al., 2019).

Flood protection standards are possibly the most relevant source of uncertainty in large-scale modelling exercises (Ward et al., 2013). In the present study we have developed a database combining reported and modelled protection levels from different sources (see Supplement). However, the overall confidence about flood protection estimates is highly variable across Europe, and in particular it is lower in Eastern Europe countries, due to the lack of information.

In Supplementary Table S9 we provide a further evaluation of country-scale results by comparing modelled annual average economic losses against reported losses retrieved from numerous sources. We find that in a number of countries (such as Czech Republic, Germany, Italy, and United Kingdom) the modelled losses are within 50% of maximum reported losses. In total, these countries account for more than 50% and 70% of, respectively, overall modelled and reported losses. Conversely, losses appear largely overestimated (i.e. more than 100%) in France, in Scandinavian countries (Denmark, Sweden and Finland), as well as in several medium-small countries (e.g. Belgium, Bulgaria, Croatia, Latvia, Lithuania).

While the mentioned limitations of the modelling framework can explain the gap between modelled and reported data, it is important to note the differences between loss data from different sources. On the one hand, national-scale studies report larger losses than European and global scale datasets, as observed in previous studies. A comparison of national disaster loss databases with EM-DAT loss data showed that total losses can be up to 60% higher, due to the fact that extensive losses from high-frequency, low-severity events are not accounted for (UNISDR 2015). This suggests a lower confidence of risk estimates where no national loss data are available. On the other hand, some national loss reports include impacts due to flash floods, coastal floods or dike failure events, which are not considered in our modelling framework. Where possible, we considered only reported losses attributed to river flooding. In Southern and Central European countries such as France, Greece, Italy and Spain, the contribution of flash floods to overall flood impacts is considerable and might equal the share due to river floods (Paprotny et al., 2018). Accurate modelling of historical loss data is further complicated by the temporal and spatial variability of risk components over the period of observations (Paprotny et al., 2018), whereas modelled losses assume fixed exposure and vulnerability. In addition, reported losses refer to specific time periods, so the estimated average annual loss is influenced by the frequency of events that can vary significantly depending on the period. Finally, our modelling framework does not consider the possibility of failure of protection measures.

#### *Uncertainty related to cost-benefit analysis*

We based our cost-benefit analysis on optimizing each adaptation measure separately at NUTS2 region level (DS and RA measures) or over a 5km grid (FP and RE measures). Furthermore, On the one hand, using uniform design levels may be not ideal since exposure can be highly variable within each NUTS2 and 5km region and therefore protection measures may be needed only in certain parts of a region, such as in urban and densely populated areas. This is especially true for measures based on exposure and vulnerability reduction (i.e. relocation and damage reduction measures), for which cost/benefit analysis can be applied even at building scale. For instance, a recent analysis carried out in United States found an average BCR of 6.5 for targeted relocation of residential houses (MHMC 2019), whereas we considered for relocation all built-up areas located within the 1-in-500-year flood extent.

On the other hand, the resolution of data and models applied in this study is strongly limited by the continental scale of the analysis. For instance, additional tests considering relocation only for built-up areas located within the 1-in-50-year flood extent did not show significant changes at European and country scale in terms of cost-benefit analysis.

Moreover, having different protections standards for nearby regions may pose problems in the implementation of measures based on hazard reduction (i.e. dykes strengthening and retention areas), which require more uniform levels of protection along the river network.

The outcomes of the adaptation analysis are sensitive to the parameters used to determine costs and benefits. We used average cost values and implementation parameters (Table 2), however these vary widely among studies. For instance, studies report higher costs of raising dykes in urbanized areas (Aerts, 2018). Descriptions of flood proofing measures report variable costs according to the type of measure (e.g. wet or dry proofing, elevation), the attainable damage reduction and the level of hazard (e.g. protection up to 1m of water depth). For relocation, implementation costs are largely dependent on building parameters (e.g. number of dwellings and storeys, market value of acquired land and relocated buildings) which are not available at EU scale.

Additional simulations using increased construction and maintenance costs (not shown here) showed that all adaptation strategies bar relocation are still cost-effective in the majority of countries and NUTS regions, even though with lower impact reduction rates .

The outcomes are also sensitive to discounting, which gives more weight to present capital costs and downgrades the benefits that will mostly come later in the century. We used discount rates in line with the EC Guide to Cost-Benefit Analysis of Investment Projects (EC, 2014) that were assumed constant in time. We did not analyse the effect of higher discount values because adaptation measures must be designed for long-term effects, and thus are penalized. Using lower or time-declining social discount rates results in higher cost-effectiveness of all the measures and supports the view that we should act now to protect future generations. As such, in the article we compare impacts under present and future scenarios using undiscounted economic values, in order to highlight the impact reduction provided by the different adaptation strategies (EC 2014). Similarly, adaptation measures are optimised considering the most likely river flow projections in 2100 under the 1.5°C, 2°C and 3°C warming scenarios. Decision makers could select a more



conservative criterion and aim to protect against the high-end, less probable future extreme river flows. This would require higher investments but imply less risks for future generations.

## S5. SI references

- 1) Aerts, J.C.J.H. A Review of Cost Estimates for Flood Adaptation. *Water*, 10(11), 1646 (2018).
- 2) Alfieri, L., Burek, P., Feyen, L., & Forzieri, G. Global warming increases the frequency of river floods in Europe. *Hydrology and Earth System Sciences*, 19(5), 2247-2260. doi:10.5194/hess-19-2247-2015 (2015).
- 3) Alfieri, L., Feyen, L., Salamon, P., Thielen, J., Bianchi, A., Dottori, F., and Burek, P., (2016). Modelling the socio-economic impact of river floods in Europe, *Natural Hazards and Earth System Sciences*, 16, 1401–1411, <https://doi.org/10.5194/nhess-16-1401-2016>.
- 4) Alfieri, L., Dottori, F., Betts, R., Salamon, P., Feyen, L. (2018) Multi-model projections of river flood risk in Europe under global warming. *Climate* 6, 6.
- 5) Amadio, M., Scorzini, A. R., Carisi, F., Essenfelder, A. H., Domeneghetti, A., Mysiak, J., and Castellarin, A., 2019. Testing empirical and synthetic flood damage models: the case of Italy, *Natural Hazards and Earth System Sciences*, 19, 661–678, <https://doi.org/10.5194/nhess-19-661-2019>.
- 6) Arnal, L., et al., 2019. EFAS upgrade for the extended model domain – technical documentation, EUR 29323 EN, Publications Office of the European Union, Luxembourg, 2019, ISBN 978-92- 79-92881-9, doi: 10.2760/806324, JRC111610.
- 7) Arrighi, C., et al. Quantification of Flood risk mitigation benefits: A building-scale damage assessment through the RASOR platform. *Journal of Environmental Management*, 207, 92-104 (2018).
- 8) Berg, H., Norway Flood inundation maps—mapping of flood prone areas in Norway. *Proceedings of The Extremes of the Extremes: Extraordinary Floods*, Reykjavik, Iceland, July 2000, IAHS Publ. no. 271.2002.
- 9) Batista e Silva, F., Rosina, K., Schiavina, M., Marín-Herrera, M., Freire, S., Ziemba, L., Craglia, M., Lavalley, C. (2018). From place of residence to place of activity: towards spatiotemporal mapping of population density in Europe. In: *Proceedings of the AGILE Conference 2018*, Lund, Sweden
- 10) Consorcio de Compensación de Seguros (CCS) e Instituto Geológico y Minero de España. *Perdidas por terremotos e inundaciones en España durante el periodo 1987-2001 y su*

- estimación para los próximos 30 años (2004-2033), 2004.  
<https://www.tiempo.com/ram/1956/perdidas-por-terremotos-e-inundaciones-en-espa-a-durante-el-periodo-1987-2001-y-su-estimacin-para-los-prximos-30-aos-2004-2033/>
- 11) Dankers, R., Arnell, N. W., Clark, D. B., Falloon, P. D., Fekete, B. M., Gosling, S. N., ... & Stacke, T. (2014). First look at changes in flood hazard in the Inter-Sectoral Impact Model Intercomparison Project ensemble. *Proceedings of the National Academy of Sciences*, 111(9), 3257-3261.
  - 12) De Moel, H., Aerts, J. C. J. H., 2011. Effect of uncertainty in land use, damage models and inundation depth on flood damage estimates, *Natural Hazards*, 58, 407-425.
  - 13) Dottori, F., Kalas, M., Salamon, P., Bianchi, A., Alfieri, L., Feyen, L. (2017). An operational procedure for rapid flood risk assessment in Europe, *Natural Hazards and Earth System Sciences*, 17, 1111–1126, <https://doi.org/10.5194/nhess-17-1111-2017>
  - 14) Dottori, F., Szewczyk, W., Ciscar, J.C., Zhao, F., Alfieri, L., Hirabayashi, Y., Bianchi, A., Mongelli, I., Frieler, K., Betts, R.A., Feyen, L. 2018. Increased human and economic losses from river flooding with anthropogenic warming. *Nature Climate Change*, 8, 781–786.
  - 15) Dottori, F., Alfieri, L., Bianchi, A., Skoien, J., and Salamon, P.: A new dataset of river flood hazard maps for Europe and the Mediterranean Basin region, *Earth Syst. Sci. Data Discuss.* [preprint], <https://doi.org/10.5194/essd-2020-313>, in review, 2021.
  - 16) EM-DAT (CRED, accessed on 30/5/2019); <http://www.emdat.be>
  - 17) European Commission (2014). Guide to Cost-Benefit Analysis of Investment Projects. doi:10.2776/97516
  - 18) Federation Francaise de l'Assurance (FFA). Impact du changement climatique sur l'assurance a l'horizon 2040, 2015
  - 19) Gersonius, B., Zevenbergen, C., Puyan, N., Billah, M.M.M. (2008). Efficiency of private flood proofing of new buildings—adapted redevelopment of a floodplain in the Netherlands. *WIT Transactions on Ecology and the Environment*, Vol 118: Flood Recovery, Innovation and Response DOI 10.2495/FRIAR080241
  - 20) Huizinga, J., Moel, H. de, Szewczyk, W. (2017). Global flood depth-damage functions. Methodology and the database with guidelines. Publications Office of the European Union, Luxembourg, EUR 28552 EN. doi: 10.2760/16510

- 21) Jacob, D., Petersen, J., Eggert, B., Alias, A., Christensen, O. B., Bouwer, L. M., ..., Yiou, P., 2014. EURO-CORDEX: new high-resolution climate change projections for European impact research. *Reg. Environ. Change* 14(2), 563-578.
- 22) Jongman, B., et al. Comparative flood damage model assessment: Towards a European approach. *Natural Hazards and Earth System Science*, 12(12), 3733-3752 (2012b).
- 23) Jongman, B., Hochrainer-Stigler, S., Feyen, L., Aerts, J. C. J. H., Mechler, R., Botzen, W. J. W., Bouwer, L. M., Pflug, G., Rojas, R., and Ward, P. J. (2014). Increasing stress on disaster-risk finance due to large floods. *Nature Climate Change* 4, 264–268, doi:10.1038/nclimate2124.
- 24) King, D., Bird, D., Haynes, K., Boon, H., Cottrell, A., Millar, J., Okada, T., Boxe, P., Keogh, D., Thomas, M. Voluntary relocation as an adaptation strategy to extreme weather events. *International journal of disaster risk reduction*, 8, 83-90 (2014).
- 25) Komelj J., Reinsurance of catastrophe risks in Slovenia. 2015 [www.aktuar.rs/XIII/8.pdf](http://www.aktuar.rs/XIII/8.pdf)
- 26) Kundzewicz, Z. (1999). Flood protection—sustainability Issues, *Hydrological Sciences Journal*, 44:4, 559-571, doi:10.1080/02626669909492252
- 27) Mentaschi, L., Alfieri, L., Dottori, F., Cammalleri, C., Bisselink, B., Roo, A. D., & Feyen, L. Independence of future changes of river runoff in Europe from the pathway to global warming. *Climate*, 8(2) (2020).
- 28) McSweeney, C.F.; Jones, R.G., 2016. How representative is the spread of climate projections from the 5 CMIP5 GCMs used in ISI-MIP? *Climate Services* 1, 24–29.
- 29) Ministry of Environment and Water Management (MMA). Flood Management in Romania – present and future. <https://www.inbo-news.org/en/file/262113/download?token=qdFXrlq>
- 30) Multi-Hazard Mitigation Council (MHMC). Natural Hazard Mitigation Saves: 2019 Report. Principal Investigator Porter, K.; Co-Principal Investigators Dash, N., Huyck, C., Santos, J., Scawthorn, C.; Investigators: Eguchi, M., et al., Directors, MMC. Investigator Intern: Cohen-Porter, A. National Institute of Building Sciences. Washington, DC. [www.nibs.org](http://www.nibs.org) (2019)
- 31) Moncoulon, D., Labat, D., Ardon, J., Leblois, E., Onfroy, T., Poulard, C., Aji, S., Rémy, A., and Quantin, A.: Analysis of the French insurance market exposure to floods: a

- stochastic model combining river overflow and surface runoff, Nat. Hazards Earth Syst. Sci., 14, 2469–2485, <https://doi.org/10.5194/nhess-14-2469-2014> , 2014.
- 32) NatCatService (Munich-RE, accessed on 1/12/2018)
  - 33) Office of Public Works (OPW). Report of the Flood Policy Review Group, 2003 <https://www.opw.ie/media/Report%20of%20the%20Flood%20Policy%20Review%20Group.pdf>
  - 34) Paprotny, D., Sebastian, A., Morales-Napoles, O., Jonkman, S. (2018) Trends in flood losses in Europe over the past 150 years. Nature Communications 9(1), 1985, <https://doi.org/10.1038/s41467-018-04253-1>.
  - 35) Puncochar, P., Flood protection in the Czech Republic and international. Anti-flood FLOOD PROTECTION IN THE CZECH REPUBLIC AND INTERNATIONAL. Problemes Actuelles de la protection contre les inondations, Paris – Orléans 28-30/03/2012. [http://www.donnees.centre.developpement-durable.gouv.fr/symposium/expose/SP1-3\\_eng.pdf](http://www.donnees.centre.developpement-durable.gouv.fr/symposium/expose/SP1-3_eng.pdf)
  - 36) Office of Public Works. Report of the Flood Policy Review Group, 2003 <https://www.opw.ie/media/Report%20of%20the%20Flood%20Policy%20Review%20Group.pdf>
  - 37) Office of Science and Technology. United Kingdom Foresight Future Flooding - Executive summary. 2004. Accessed on 19/4/2021 at [https://assets.publishing.service.gov.uk/government/uploads/system/uploads/attachment\\_data/file/300332/04-947-flooding-summary.pdf](https://assets.publishing.service.gov.uk/government/uploads/system/uploads/attachment_data/file/300332/04-947-flooding-summary.pdf)
  - 38) Richert C., Erdlenbruch, K., Grelot, F., The impact of flood management policies on individual adaptation actions: Insights from a French case study. Ecological Economics 165, 106387, 2019 <https://doi.org/10.1016/j.ecolecon.2019.106387>
  - 39) Rosina K., Batista e Silva, F., Vizcaino, P., Marín Herrera M., Freire S., Schiavina M. (2018). Increasing the detail of European land use/ cover data by combining heterogeneous data sets, International Journal of Digital Earth, DOI: 10.1080/17538947.2018.1550119
  - 40) Smith A. et al., (2019). New estimates of flood exposure in developing countries using high-resolution population data. Nature Communications 10, 1814

- 41) Scussolini, P., Aerts, J. C., Jongman, B., Bouwer, L. M., Winsemius, H. C., de Moel, H., Ward, P. J. (2016). FLOPROS: an evolving global database of flood protection standards. *Natural Hazards and Earth System Sciences*, 16(5), 1049-1061.
- 42) Silander J, Huokuna, M., Sane M. Aaltonen, J., Parjanne A., (2012). Flood hazard and risk maps & storm water floods in Finland. Seminar on Climate Change Adaptation in the Gulf of Finland Accessed on 19/4/2021 at [http://cliplive.infoeco.ru/dl/sem1/SilanderJari\\_SYKE.pdf](http://cliplive.infoeco.ru/dl/sem1/SilanderJari_SYKE.pdf)
- 43) Soukopova, J., Furova, L.: Macroeconomic implication of the floods – a case study for the regions of the Czech Republic. *Acta univ. agric. et silvic. Mendel. Brun.*, 2012, LX, No. 7, pp. 00–00 [https://is.muni.cz/repo/1073621/soukopova\\_furova\\_60\\_7\\_2012.pdf](https://is.muni.cz/repo/1073621/soukopova_furova_60_7_2012.pdf)
- 44) UNISDR. Making Development Sustainable: The Future of Disaster Risk Management. Global Assessment Report on Disaster Risk Reduction. Geneva, Switzerland (2015).
- 45) Ward, P.J. et al, Assessing flood risk at the global scale: model setup, results, and sensitivity *Environ. Res. Lett.* 8 044019, 2013
- 46) Wing, O. E. J., Bates, P. D., Neal, J. C., Sampson, C. C., Smith, A. M., Quinn, N., et al. (2019). A New Automated Method for Improved Flood Defense Representation in Large-Scale Hydraulic Models. *Water Resources Research* 55, 11007-11034, <https://doi.org/2019WR025957>
- 47) World Bank Group - GFDRR. Europe and Central Asia (ECA) risk profiles – Poland. 2015. <http://pubdocs.worldbank.org/en/164681483041874662/poland.pdf>
- 48) Swiss Federal Institute for Forest, Snow and Landscape Research (WSL) ,2018, accessed on 19/4/2021 at <https://www.slf.ch/en/news/2018/03/substantial-flood-and-landslide-damage-in-switzerland-2017-eight-deaths-and-extensive-material-damage.html>
- 49) Zelenáková M., Vranayová Z., Flood damages in Slovakia. *Recent Advances in Environmental and Earth Sciences and Economics*, ISBN: 978-1-61804-324-5
