# Supplementary material for: Adaptation is cost-effective to offset rising river flood risk in Europe
Source: Research Square preprint supplement (doi:10.21203/rs.3.rs-519118/v1), 2021-05-21
Supplement: Supplementary file 2 [file 02289ed0283c8d11706d1b47.xlsx]

## Sheet: Summary
	unit	Normalized unit cost (average 2015)
		Average	25% quantile	75% quantile
Dike systems - building and reinforcement	€/m/m	6405.28	1829	9513.66
Retention areas and storage Systems	€/m3	3.73443	1.04619	4.9971
Flood-proofing measures for buildings	€/m2	375.652	492.817	156.052
Relocation of buildings and population	€/m2	1373	906.18	1826.09

## Sheet: Unit costs
Costs reported in literature
Dike systems - building and reinforcement
Dyke heightening		Total cost (M€)	Unit cost min (€/m/m)	Unit cost max (€/m/m)		year	annual costs (€/m)	Actualized avg unit cost (€/m/m)	Constr. cost coefficient (EU=100)	Normalized cost (EU ref)	Country	primary /secondary source	notes
Very large dike (>15000 m3)			1160	1160		EUR 2012 values		1214.05	112.087	1083.13	United Kingdom	Lenk et al. (2017)
generic dike			400	3300		EUR 2012 values		1936.2	112.087	1727.41	United Kingdom	Lenk et al. (2017)
generic dike (rural areas)			9600	11500		EUR 2012 values		11041.6	112.485	9816.05	Netherlands	Lenk et al. (2017)
generic dike (rural areas)			4700	13800		EUR 2012 values		9681.02	112.485	8606.49	Netherlands	Lenk et al. (2017)
generic dike (rural areas)			8000	8000		EUR 2012 values		8372.78	112.485	7443.45	Netherlands	Lenk et al. (2017)
generic dike (urban areas)			19200	23000		EUR 2012 values		22083.2	112.485	19632.1	Netherlands	Lenk et al. (2017)
generic dike (urban areas)			15900	15900		EUR 2012 values		16640.9	112.485	14793.9	Netherlands	Lenk et al. (2017)
Standard			300	2000		EUR 2002 values		1522.43	108.492	1403.26	Belgium	Broekx et al (2011)
Wall on top			800	2500		EUR 2002 values		2184.36	108.492	2013.38	Belgium	Broekx et al (2011)
Sheet pile wall			3500	5000		EUR 2002 values		5626.38	108.492	5185.97	Belgium	Broekx et al (2011)
Quay wall (Antwerp)			16100	16100		EUR 2002 values		21314.1	108.492	19645.7	Belgium	Broekx et al (2011)	6km of total length
dyke heightening with sheet pile wall		16700000	2783.3	2783.3				3441.72	109.333	3147.92	Germany	OIE (2005)
Dike reinforcement			4000	6000				5563.59	109.333	5088.66	Germany	EEA (2017)
Dike reinforcement			3000	5000				4450.87	112.485	3956.85	Netherlands	EEA (2017)
Dyke building		Total cost (M€)	Unit cost min (€/m/m)	Unit cost max (€/m/m)		year	annual costs (€/m)	Actualized avg unit cost (€/m/m)	Constr. cost coefficient (EU=100)	Normalized cost (EU ref)	Country	primary /secondary source	notes
flood wall - retaining			2385	3484				3553.94	126.677	2805.51	Ireland	Lee Catchment CFRAM (2014)	varying costs according to dike height
flood wall - retaining and cut off			1396	4619				4711.73	126.677	3719.47	Ireland	Lee Catchment CFRAM (2014)	varying costs according to dike height
flood wall - retaining and piled			4071	13897				14176	126.677	11190.6	Ireland	Lee Catchment CFRAM (2014)	varying costs according to dike height
flood wall - wall raising foundations			1175	1980				2019.75	126.677	1594.41	Ireland	Lee Catchment CFRAM (2014)	varying costs according to dike height
flood wall - wave			1871	2195				2239.06	126.677	1767.54	Ireland	Lee Catchment CFRAM (2014)
dike building			1500	2800				3115.61	109.333	2849.65	Germany	EEA (2017)
dike building			700	700				771.191	109.333	705.359	Germany	EEA (2017)
dike building			4000	4000				4726.33	109.333	4322.87	Germany	EEA (2017)
river wall (urban areas only)			14000	17000				18916.2	109.333	17301.5	Germany	EEA (2017)	2.8km of total length
flood protection wall		9500000	3392.9	3392.9				4292.02	109.333	3925.64	Germany	OIE (2005)
average unit costs - heightening			6870.28	8753.61				8219.51		7396.01
average unit costs - building			3449.09	5223.71				5852.18		5018.25
total average and median of costs								7233.12		6405.28	3941.25
quantiles of distribution (25%,75%) -st deviation										1829	9513.66	5951.22
total number of entries used										24
Dyke heightening - not used (either small or special structures, or not EU countries)
Earth embankment (500-5000 m3)				99				100.987	126.677	79.7203	Ireland	Lee Catchment CFRAM (2014)
Earth embankment (5000-55000 m3)				70				71.4052	126.677	56.3679	Ireland	Lee Catchment CFRAM (2014)
Earth embankment (>15000 m3)				37				37.7428	126.677	29.7944	Ireland	Lee Catchment CFRAM (2014)
small dike (<500m3)	-			140		EUR 2012 values		146.524	112.087	130.723	United Kingdom	Lenk et al. (2017)
medium dike (500–5000 m3)	-		10	960		EUR 2012 values		1004.73	112.087	896.384	United Kingdom	Lenk et al. (2017)
large dike (5000 –15000 m3)	-		550	16670		EUR 2012 values		17446.8	112.087	15565.3	United Kingdom	Lenk et al. (2017)	unit cost in US$ derived from literature review
generic dike (heightening)				7000 US$							global
River dike			10900	16800		2016	0.01%-1%	15177.5	99.81	15206.4	United States	Aerts (2018)
River dike				4100		2016		3704.04			Laos	Aerts (2018)
River dike				5300		2016	0.01%-1%	4788.15	99.81	4797.26	Canada	Aerts (2018)
Rural dike			5000	14000		2016	0.05%-1%	12647.9	112.485	11244.1	Netherlands	Aerts (2018)
Rural dike				1900		2016		1716.51	99.81	1719.77	Canada	Aerts (2018)
small earthen dike			100	200		2016		180.685			Philippines/Mozambique	Aerts (2018)
Rural dike			1	1700		2016		1535.82			Vietnam	Aerts (2018)
Rural dike			3400	3900		2016		3523.35			Indonesia	Aerts (2018)
Deployable floodwall				5600		2016		5059.17	99.81	5068.8	United States	Aerts (2018)
T-wall				13800		2016	0.01%-1%	12467.3	99.81	12491	United States	Aerts (2018)
T-wall				29300		2016	0.01%-1%	26470.3	99.81	26520.7	United States	Aerts (2018)
										7215.87
Retention areas and storage Systems	Area(km2)	Total cost (MEUR)	Stored volume (Mm3)	Cost per areal unit (€-$/m2)	Cost per storage unit (€-$/m3)	year	annual costs (M€/year)	Actualized avg unit cost (€/m3)	Costruction cost coefficient (EU=100)	Final normalized cost (EU ref)	Country	primary /secondary source	notes
annual maintenance of retention areas							0.5%-1.5%		108.492		Belgium	Broekx et al (2011)	EUR 2002 values
Land acquisition and compensation - average				5.3					108.492		Belgium	EEA (2017)	3.90651
Construction costs-storage areas	1.09	15.09	6.03	13.844	2.50249			2.50249	97.7113	2.5611	Italy	Arrighi et al (2018)	5.53211	ratio volume/area
Construction costs-storage areas	1.21	8	2.47	6.61157	3.23887			3.23887	97.7113	3.31473	Italy	Arrighi et al (2018)	2.04132	ratio volume/area
Construction costs-storage areas	1.37	25	6.6	18.2482	3.78788			3.78788	97.7113	3.8766	Italy	Arrighi et al (2018)	4.81752	ratio volume/area
Construction costs-storage areas	1.34	25.24	6.7	18.8358	3.76716			3.76716	97.7113	3.8554	Italy	Arrighi et al (2018)	5	ratio volume/area
Construction costs- storage areas				36.0573	12.0191			14.8623	109.333	13.5936	Germany	EEA (2017)	unit cost per storage unit derived assuming 3.5 as ratio volume/area
Construction costs- storage areas				13.6542	4.5514			5.01428	108.492	4.62178	Belgium	EEA (2017)	unit cost per storage unit derived assuming 3.5 as ratio volume/area
Overall costs				0.5	0.166667			0.185453	60	0.309088	Romania/Bulgaria	EEA (2017)	unit cost per storage unit derived assuming 3.5 as ratio volume/area
Overall costs		10550					0.0035		109.333		Germany	EEA (2017)	Crops and pastures
works for flood retention		1895	437		4.33638			5.48553	109.333	5.01727	Germany	OIE (2005)
retention pool and constrining dam	2.5	35.8	8	14.32	4.475			5.66088	109.333	5.17765	Germany	OIE (2005)	3.2	ratio volume/area
retention pool and cbackward dyke reolocation	1.58	19.2	4.5	12.1519	4.26667			5.39734	109.333	4.9366	Germany	OIE (2005)	2.8481	ratio volume/area
retention pool		1.025	0.5		2.05			2.59325	109.333	2.37188	Germany	OIE (2005)
creation of new resevoirs		7	1.4		5			6.325	104.669	6.04288	France	OIE (2005)
creaction of retention areas	10	15		1.5	0.5			0.6325	104.669	0.604288	France	OIE (2005)	unit cost per storage unit derived assuming 3.5 as ratio volume/area
revitalise flood plains	1160	680		0.586207	0.293103			0.370776	109.333	0.339125	Germany	OIE (2005)	unit cost per storage unit derived assuming 2 as ratio volume/area
reactivation of floodplain areas		3	6		0.5			0.6325	104.669	0.604288	France	OIE (2005)
retention area	8.7	98	32	11.2644	3.0625	2015		2.76025	109.333	2.52463	Germany	Aerts (2018)	3.67816	ratio volume/area
total average and median of costs (not including relocation costs)								2584.81		3.73443	3.58507		3.87797	average ratio volume/area
quantiles of distribution (25%,75%) -st deviation										1.04619	4.9971	3.22757
total number of entries used										16
Storage areas - not used (not enough data to compute unit costs, or not EU countries)
retention area	26	429	373	16.5	1.15013	2005	5	1.14694			Peru	reported in Aerts (2018)
storage areas <20'000 m3					305						Ireland	Lee Catchment CFRAM (2014)	not considered because unit costs are much larger than average costs for othe countries
storage areas 20'000-50'000 m3					206						Ireland	Lee Catchment CFRAM (2014)	not considered because unit costs are much larger than average costs for othe countries
storage areas 50'000-75'000 m3					107						Ireland	Lee Catchment CFRAM (2014)	not considered because unit costs are much larger than average costs for othe countries
storage areas >75'000 m3					76						Ireland	Lee Catchment CFRAM (2014)	not considered because unit costs are much larger than average costs for othe countries
wetland restoration and management				0.3075							(CH, AT, IT, FR, DE)	EEA (2017)
wetland restoration and management				0.2244							Belgium	EEA (2017)
wetland restoration and management				0.1359							UK	EEA (2017)
wetland restoration and management				5.3949							Belgium	EEA (2017)
wetland restoration and management				0.5885							Denmark	EEA (2017)
Inner dike adaptation (€/m)				770							Belgium	Broekx et al (2011)	EUR 2002 values
Outer dike construction (€/m)				840							Belgium	Broekx et al (2011)	EUR 2002 values
Outlet sluices (€/ha)				1.9							Belgium	Broekx et al (2011)	EUR 2002 values
Inlet sluices CRT (€/ha)				0.4							Belgium	Broekx et al (2011)	EUR 2002 values
Vulnerability reduction	building type	Cost per house min	Cost per house max	Reduction min	Reduction max	Year	annual costs	Actualized avg unit cost	Costruction cost coefficient (EU=100)	Final normalized cost (EU ref)	Country	primary /secondary source	notes
Wet proofing 100 cm		17700		0.15	0.53			209.14	112.485	185.927	Netherlands	Gersonius et al. (2008) - Kreibich (2015)	reused by De Moel et al (2011)
Dry proofing temp. 90 cm		2300		0.1	0.84			27.1764	112.485	24.16	Netherlands	Gersonius et al. (2008) - Kreibich (2015)	reused by De Moel et al (2011)
Dry proofing perm. 90 cm		7600		0.1	0.84			89.8003	112.485	79.833	Netherlands	Gersonius et al. (2008) - Kreibich (2015)	reused by De Moel et al (2011)
Temporary resistance, e.g., flood guards		2552	5104	0.29	0.8			46.3176	112.087	41.3227	United Kingdom	Kreibich (2015)
Waterproof cellar sealing (area 65m2)		18532	21148	0.1	0.84			336.273	109.333	307.568	Germany	Kreibich (2015)
Mobile water barrier		6100		0.29	0.8			67.2038	109.333	61.467	Germany	Kreibich (2015)
Basement or cellar tanking		7656	12760	0.1	0.84			123.513	112.087	110.194	United Kingdom	Kreibich (2015)
Wet proofing (various measures)		800	25000	0.38	0.84			129.645	104.669	123.862	France	Poussin et al 2015	costs based on unit costs from US and British studies (see Poussin for refs)
Dry proofing (up to 1m)				0.1	0.6						Netherlands	ICPR report (2002) - Poussin et al (2012)
Wet proofing				0.4	0.4						Netherlands	ICPR report (2002) - Poussin et al (2012)
Dry proofing temp. 60 cm	residential	8290	13690			2009		87.674	99.81	87.8409	United States	Aerts (2018)
Dry proofing temp. 200 cm	residential	12576	21127			2009		134.435	99.81	134.691	United States	Aerts (2018)
Dry proofing temp. 90 cm	residential	13000	18201			2008	1-3%	122.391	112.087	109.192	United Kingdom	Aerts (2018)
Dry proofing temp. 100 cm (m2)	average building		732			2011		583.962	109.333	534.113	Germany	Aerts (2018)
Wet proofing 60-270 cm (m2)	Basement waterproof	31	184			2009		85.7594	99.81	85.9227	United States	Aerts (2018)
Wet proofing (m2)	Basement waterproof		606			2011		483.444	109.333	442.175	Germany	Aerts (2018)
Wet proofing 60 cm	residential	2151	4869			2009		28.0014	99.81	28.0547	United States	Aerts (2018)
Wet proofing 270 cm	residential	8531	19307			2009		111.04	99.81	111.252	United States	Aerts (2018)
Wet proofing 90 cm	residential	8073	18369			2008		103.723	112.087	92.5375	United Kingdom	Aerts (2018)
Wet proofing 90 cm	office	14937	24895			2008		156.247	112.087	139.398	United Kingdom	Aerts (2018)
Wet proofing (65 m2)	residential		22237			2011		265.193	109.333	242.555	Germany	Aerts (2018)
Dry proofing (50cm) (area 95-130m2)		6300	8600	0	0.32	2019		55.1336	104.669	52.6743	France	Richert et al (2019)
Dry proofing (100cm) (area 95-130m2)		7700	10400	0	0.36	2019		66.9743	104.669	63.9869	France	Richert et al (2019)
component adaptation (area 95-130m2)		30000	53900	0	0.536	2019		310.45	104.669	296.602	France	Richert et al (2019)
average unit costs (m2 assuming average damage reduction / theoretical 100% reduction)					0.406			167.944		152.515	375.652
median of costs (m2 assuming average damage reduction / theoretical 100% reduction)								166.146		109.693	270.18
quantiles of distribution (75%) -st deviation					0.8					200.084	492.817
quantiles of distribution (25%) -st deviation					0.1					63.357	156.052
standard deviation										134.19
total number of entries used										19
Vulnerability reduction - not used (elevation of buildings not considered - not enough data to compute benefits, or not EU countries)	building type	Cost per house min	Cost per house max	Reduction min	Reduction max	Year	annual costs	Actualized avg unit cost	Costruction cost coefficient (EU=100)		Country	primary /secondary source	notes
Elevation existing building +60cm	Average residential building	33239	82498	not specified		2009					United States	Aerts (2018)
Elevation existing building +120cm	Average residential building	35464	87535	not specified		2009					United States	Aerts (2018)
Elevation existing building +190 cm	Average residential building	37319	91732	not specified		2009					United States	Aerts (2018)
Elevation	Average building	19231	192000	not specified		2015					United States	Aerts (2018)
Stilts bamboo, reinforced concrete	Rural house, wooden frame	1250	2500	not specified		2015					Bangladesh/Vietnam	Aerts (2018)
Fill sand +2 m	Average residential building	1500	3000	not specified		2014					Bangladesh	Aerts (2018)
Dry proofing temp. 100 cm	residential	500	9362			2013		3787.36			Vietnam	Aerts (2018)
Dry proofing temp. 100 cm	residential		$516/m2			2014					Vietnam	Aerts (2018)
Dry proofing temp. 100 cm	residential	679	1301			2010		760.39			Bangladesh	Aerts (2018)
Wet proofing	residential		962			2010		799.454			Brazil	Aerts (2018)
Wet proofing 100 cm	residential		962			2014		727.746			Vietnam	Aerts (2018)
Dry proofing temp. 100 cm	waste water pump station		45571			2016		410.735	99.81	411.516	United States	Aerts (2018)
land acquisition and relocation	Area(km2)	Costs (MEUR)	Cost per building	Cost per areal unit	estimated area	year of value	annual costs	Actualized avg unit cost	Costruction cost coefficient (EU=100)	Final normalized cost (EU ref)	Country	primary /secondary source	notes
NOTE: given the low number of entries for this category, we calculated implementation costs by using construction costs from Huizinga et al (2017)
relocation	5.18107	6.7872	183437	1834.37	100	2012		1919.85	109.333	1755.96	Germany	Meyer et al (2012)
Dispropriation + demolition cost - houses			130000	1300	100	2002		1721.01	108.492	1586.3	Belgium	Broekx et al (2011)
Dispropriation + demolition cost - companies			280000	1866.67	150	2002		2471.2	108.492	2277.76	Belgium	Broekx et al (2011)
relocation			349000	2326.67	150	2015		2097.04	99.81	2101.03	United States	Aerts (2018)
demolition costs			30000	300		2002		397.157	108.492	366.068	Belgium	Broekx et al (2011)
average unit costs (dispropriation+demolition)										1930.26
Other data (not enough data to compute unit costs)
compensation and infrastructure building	0.29	AUS$ 18	AUS$ 35000			2014					Australia	Okada et al. (2014)	costs in Aus $ - total costs are for infrastructure building in the new settlement areas
compensation costs for buyout programme			75% of house value			2011			99.81		United States	Kick et al 2011	compensation costs
Land acquisition and compensation - residential areas				70		2002			108.492		Belgium	Broekx et al (2011)
Land acquisition and compensation - industrial areas				2.4046		2002			108.492		Belgium	Broekx et al (2011)
Land acquisition and compensation - recreational areas				1.22		2002			108.492		Belgium	Broekx et al (2011)
Espropriation and relocation of crops (sugar beet, potato, vegetables, orchards,tree nurseries)				1		2002			108.492		Belgium	Broekx et al (2011)
Dispropriation cost - farms			250000	2500		2002		3309.64	108.492	3050.57	Belgium	Broekx et al (2011)
Other adaptation measures	total costs	extent		Land acquisition and compensation	Construction and rehabilitation	Year	Operation and maintenance				Country	primary /secondary source	notes
NOTE: more adaptation measures and related souces are reported in Aerts (2018)
				(€/ha)	(€/km)		(€/km/y)
River re-meandering					277012						Denmark	EEA (2017)
River re-meandering				611	535689		2				Denmark	EEA (2017)
				(€/ha)	(€/ha)		(€/ha/y)
streambed re-naturalisation				548	12671						Switzerland	EEA (2017)
streambed re-naturalisation				27009							Czech Republic	EEA (2017)
					(M€/m)		(€/km/y)
Longitudinal barriers					1.82						Netherlands	EEA (2017)
Longitudinal barriers					0.84						Netherlands	EEA (2017)
Longitudinal barriers					1.68						Netherlands	EEA (2017)
Longitudinal barriers					0.55						Netherlands	EEA (2017)
Longitudinal barriers					1.02						Germany	EEA (2017)
Longitudinal barriers					2.73						UK	EEA (2017)
Longitudinal barriers					1.46						Italy	EEA (2017)
Longitudinal barriers							5%-10%				Europe	EEA (2017)
		km2
flood risk mapping and communication	60000000										Germany	OIE (2005)
citizens information, training of flood management professionals	61000000						760000				France	OIE (2005)
establishment of emergency plans	7600000						1200000				France	OIE (2005)
limit the use of floodplains	1705000000	3900									Germany	OIE (2005)	increase of agricultural areas
increasing retention capabilty of soils	1890000000	2500									Germany	OIE (2005)	reduce impervious areas
restore streams	1160000000	11000									Germany	OIE (2005)
develop nature, re-afforest	3480000000	3500									Germany	OIE (2005)
			Costs (MEUR)	annual costs
flood forecasting and early warning systems			0.148	4.175							Germany	Meyer et al, 2012
flood forecasting and early warning systems			12000000								Germany	OIE (2005)	forecasting period extended by up to 100%
improve forecasting tools and development of early warning procedures			7600000								France	OIE (2005)	1'200'000 annual operational costs

## Sheet: Bibliography-all
Primary source	Secondary source	PESETA IV references	Source number	primary source accessed?	Secondary source accessed?	Full reference
Aerts (2018)		yes	62	√		Aerts, J. A Review of Cost Estimates for Flood Adaptation. Water 10, 1646; doi:10.3390/w10111646r (2018)
Arrighi et al 2018		yes	33	√		Arrighi, C., Rossi, L., Trasforini, E., Rudari, R., Ferraris, L., Brugioni, M., ... & Castelli, F. Quantification of Flood risk mitigation benefits: A building-scale damage assessment through the RASOR platform. Journal of environmental management, 207, 92-104 (2018).
Broekx et al., 2011	EEA (2017)	yes	42	√	√	Broekx S, Smets S, Liekens I, Bulckaen D, De Nocker L. Designing a long-term flood risk management plan for the Scheldt estuary using a risk-based approach. Nat Hazards (2011) 57:245–266 DOI 10.1007/s11069-010-9610-x
EEA (2017)		yes	60	√		European Environment Agency. Green Infrastructure and Flood Management. Promoting cost-efficient flood risk reduction via green infrastructure solutions, 155 pp (2017) — . doi:10.2800/324289
EWASE 2008	Shreve & Kelman 2014	no	1		√
Gersonius et al 2008		yes	38	√		Gersonius, B., Zevenbergen, C., Puyan, N., Billah, M.M.M. Efficiency of private flood proofing of new buildings—adapted redevelopment of a floodplain in the Netherlands. WIT Transactions on Ecology and the Environment, Vol 118: Flood Recovery, Innovation and Response (2008), DOI 10.2495/FRIAR080241
http://www.circle-era.eu/np4/%7B$clientServletPath%7D/?newsId=432&fileName=BOOK_150_dpi.pdf		no	8
ICPR (2002)	Poussin et al (2012	yes	63		√
ICPR (2002)	Poussin et al (2012	yes	64		√	ICPR: Non Structural Flood Plain Management: Measures and Their Effectiveness, International Commission for the Protection of the Rhine (ICPR), Koblenz, 2003
Kick et al,, 2011		yes	41	√		Kick EL, Fraser JC, Fulkerson GM, et al. Repetitive flood victims and acceptance of FEMA mitigation offers: an analysis with community–system policy implications. Disasters 35, 510–539 (2011), doi:10.1111/j.1467- 7717.2011.01226.x
Kreibich et al 2007		no	34	√		Kreibich, H., Müller, M., Thieken, A.H., et al. Flood precaution of companies and their ability to cope with the flood in August 2002 in Saxony, Germany. Water Resour Res 43:W03408 (2007), doi:10.1029/2005WR00469
Kreibich et al 2012		no
Kreibich et al 2015		yes		√		Kreibich H, Bubeck P, Van Vliet M, De Moel H. A review of damage-reducing measures to manage fluvial flood risks in a changing climate, Mitig Adapt Strateg Glob Change 20, 967–989 (2015), doi:10.1007/s11027-014-9629-5
Lee Catchment Flood Risk Assessment and Management Study 2010		yes	15	√		Lee Catchment Flood Risk Assessment and Management (CFRAM) Study, Final Report. Halcrow Group Ireland Ltd (2014).
Lenk et al., 2017		yes	39	√		Lenk, S., Rybski, D., Heidrich, O., Dawson, R. J., and Kropp, J. P. Costs of sea dikes – regressions and uncertainty estimates, Nat. Hazards Earth Syst. Sci., 17, 765-779, https://doi.org/10.5194/nhess-17-765-2017, 2017.
Meyer 2012		yes	31	√		Meyer, V., Priest, S., Kuhlicke, C. Economic evaluation of structural and non-structural flood risk management measures: examples from the Mulde River. Nat Hazards (2012) 62:301–324, DOI 10.1007/s11069-011-9997-z
OIE (2005)		yes	61			Office International de l'Eau. Evaluation of the impact of floods and associated protection policies. Final Report Annexes, 2005
Okada et al., 2014		yes	43	√		TetsuyaOkada T,Haynes K, Deanne Bird D,van den Honert R,King D. Recovery and resettlement following the 2011 flash flooding in the Lockyer Valley. International Journal of Disaster Risk Reduction 8 20–31 (2014)
Poussin 2012		yes				Poussin, J. K., Bubeck, P., Aerts, J. C. J. H., and Ward, P. J.: Potential of semi-structural and non-structural adaptation strategies to reduce future flood risk: case study for the Meuse, Nat. Hazards Earth Syst. Sci., 12, 3455-3471, https://doi.org/10.5194/nhess-12-3455-2012, 2012.
Poussin 2015		yes	27	√		Poussin JK, Wouter Botzen WJ, Aerts JCJH. Effectiveness of flood damage mitigation measures: Empirical evidence from French flood disasters. Global Environmental Change 31, 74–84 (2015)
Richert et al 2019		yes		√		Richert, C., Boisgontier, H., and Grelot, F.: Economic assessment of precautionary measures against floods: insights from a non-contextual approach, Nat. Hazards Earth Syst. Sci., 19, 2525–2539, https://doi.org/10.5194/nhess-19-2525-2019, 2019.
Shreve & Kelman 2014		yes		√		Shreve CM, Kelman I. Does mitigation save? Reviewing cost-benefit analyses of disaster risk reduction. International Journalof Disaster Risk Reduction 10, 213–235 (2014)
Ward et al 2017		yes	35	√		Ward, P. J., Jongman, B., Aerts, J. C., Bates, P. D., Botzen, W. J., Loaiza, A. D., ... & Winsemius, H. C. A global framework for future costs and benefits of river-flood protection in urban areas. Nature Climate Change, 7(9), 642 (2017).
Balesteros 2013		no	26
Boettle 2013		no	29
CIRCLE-2		no	8
Copenhagen Climate Adaptation Plan 2011		no	12
CPB (2000)	EEA (2017)	no	59		√
Dehnhardt et al (2008)	EEA (2017)	no	58		√
Forster and Kneis 2005	Shreve & Kelman 2014	no	2
Fosumpaur and Satrapa		no	25
Fuchs 2006		no	7
Gersonius et al 2012		no	24
Gersonius et al 2013		no	23
Gocht 2004	Shreve & Kelman 2014	no	3
Grossmann and Hartje (2012)	EEA (2017)	no	47		√
Grossmann et al (2010)	EEA (2017)	no	56		√
Hennequin et al., 2018		no	40	√
Hillen et al. (2010)	EEA (2017)	no	54		√
Holub and Fuchs, 2008	Shreve & Kelman 2014	no	4	√		Holub M., Fuchs S. Benefits of local structural protection to mitigate torrent-related hazards. Risk Analysis, doi:10.2495/RISK080391
http://ec.europa.eu/ourcoast/index.cfm?menuID=4&articleID=40		no	10
http://en.klimatilpasning.dk/recent/cases/items/aarhusengelsk.aspx		no	11			not found
ICPR (2006)	EEA (2017)	no	46		√
Jha et al., 2012		no	17
Jongepierova et al, 2012	EEA (2017)	no	53		√
Kind 2011		no	20
Kohler & Heinrichs, 2011	EEA (2017)	no	49		√
Kontogianni et al 2014		no	18
Larsson 2012		no	6	√
Linham and Nicholls (2010)	EEA (2017)	no	55		√
Mazza et al 2011	EEA (2017)	no	44		√
mer-perkpolder		no	16
Merz, Gocht 2001	Shreve & Kelman 2014	no	1
Molinari et al., 2013		no	37	√		Molinari D., Ballio F., Menoni S. Modelling the benefits of flood emergency management measures in reducing damages: A case study on Sondrio, Italy. Nat. Hazards Earth Syst. Sci., 13, 1913-1927 (2013).
Naumann et al, 2011	EEA (2017)	no	50		√
Nocker and Mazza, 2011	EEA (2017)	no	51		√
NWRM, 2014a	EEA (2017)	no	52		√
OURCOAST website		no	10
Pappenberger et al 2015		no	36	√		Pappenberger F., Cloke, H. L., Parker, D.J., Wetterhall, F., Richardson, D.S, Thielen, J. The monetary benefit of early flood warnings in Europe. Environmental Science & Policy 51, 278-291 (2015).
Porthin 2013		no	32
Projectconsortium MKBA Sigmaplan 2004		no	9			not found
RIZA rapport 2005.025		no	22
Saint-Geours et al 2015		no	21
Schwarz (2010)	EEA (2017)	no	45		√
Sistermans and Nieuwenhuis 2005		no	13
Sistermans and Nieuwenhuizen		no	14
Stella, 2012	EEA (2017)	no	48		√
Thompson, Wigg, Parker 1991		no	5
Tröltzsch et al (2011)	EEA (2017)	no	57		√
Woodward et al. 2013		no	19
Zhou 2013		no	28

## Sheet: inflation_gdp
	Year	2002	2003	2004	2005	2006	2007	2008	2009	2010	2011	2012	2013	2014	2015	2016	2017	2018	2019
	annual inflation in EU28 ( %, source OECD)	2.5	2.1	2.3	2.3	2.3	2.4	3.7	1	2.1	3.1	2.6	1.5	0.5	0.1	0.2	1.7	1.9	1.5
	inflation correction (to 2015)	1.32386	1.29157	1.265	1.23656	1.20997	1.18158	1.15389	1.11272	1.1017	1.07904	1.0466	1.02007	1.005	1	1	1	1	1
															1.03943
	Exchange rates	2002	2003	2004	2005	2006	2007	2008	2009	2010	2011	2012	2013	2014	2015	2016	2017
	EUR-US dollar			1.24	1.24	1.2556	1.3705	1.4708	1.3948	1.3257	1.392	1.2848	1.3281	1.3285	1.1095	1.1069	1.1297
	EUR CHF					1.5729	1.6427	1.5874	1.51	1.3803	1.2326	1.2053	1.2311	1.2146	1.0679	1.0902	1.1117
